# Supplementary material
Source: PubMed Central journal article supplement (PMC3188836)

## Supplemental Data

### Variants Near *FOXE1* Are Associated with Hypothyroidism and Other Thyroid Conditions: Using Electronic Medical Records for Genome- and Phenome-wide Studies

Joshua C. Denny, Dana C. Crawford, Marylyn D. Ritchie, Suzette J. Bielinski, Melissa A. Basford, Yuki Bradford, High Seng Chai, Lisa Bastarache, Rebecca Zuvich, Peggy Peissig, David Carrell, Andrea H. Ramirez, Jyotishman Pathak, Russell A. Wilke, Luke Rasmussen, Xiaoming Wang, Jennifer A. Pacheco, Abel N. Kho, M. Geoffrey Hayes, Noah Weston, Martha Matsumoto, Peter A. Kopp, Katherine M. Newton, Gail P. Jarvik, Rongling Li, Teri A. Manolio, Iftikhar J. Kullo, Christopher G. Chute, Rex L. Chisholm, Eric B. Larson, Catherine A. McCarty, Daniel R. Masys, Dan M. Roden, and Mariza de Andrade

#### Table of Contents

|                                                                                                                           |    |
|---------------------------------------------------------------------------------------------------------------------------|----|
| Table S1: Minor Allele Frequency (MAF) for SNPs near <i>FOXE1</i> by site in Unmatched Analysis.....                      | 2  |
| Table S2: Characteristics of hypothyroidism cases and controls.....                                                       | 3  |
| Table S3: SNPs associated with hypothyroidism at $p < 10^{-6}$ in the unmatched and matched analyses.....                 | 4  |
| Table S4: Association of variants near <i>FOXE1</i> by eMERGE site in the matched analysis.....                           | 5  |
| Table S5: Strongest associations for HLA region in unmatched analysis for European Americans. ....                        | 6  |
| Table S6: <i>FOXE1</i> SNPs associated with hypothyroidism in the Replication Analysis. ....                              | 8  |
| Figure S1: Algorithm for identifying primary hypothyroidism cases and controls. ....                                      | 9  |
| Figure S2: Analysis of Linkage Disequilibrium from 1000genomes Pilot 1 CEU samples to <i>FOXE1</i> locus (rs7850258)..... | 10 |
| Figure S3: Genome-wide Association Analysis from non-TSH controls. ....                                                   | 11 |
| Figure S4: Result of Genome-wide Association Analysis from Matched Analysis. ....                                         | 12 |
| Figure S5: Location and linkage disequilibrium ( $r^2$ ) for SNPs surrounding <i>FOXE1</i> from matched analysis.....     | 13 |
| Figure S6: Q-Q plot for unmatched analysis. ....                                                                          | 14 |
| Figure S7: Q-Q plot for comparison to non-TSH controls.....                                                               | 15 |
| Figure S8: Q-Q plot for matched analysis. ....                                                                            | 16 |

**Table S1: Minor Allele Frequency (MAF) for SNPs near *FOXE1* by site in Unmatched Analysis.**

| Chr | SNP        | Position | GHC               |                       | Marshfield        |                       | Mayo              |                       | Northwestern     |                      | Vanderbilt       |                      |
|-----|------------|----------|-------------------|-----------------------|-------------------|-----------------------|-------------------|-----------------------|------------------|----------------------|------------------|----------------------|
|     |            |          | Case MAF<br>N=233 | Control MAF<br>N=1884 | Case MAF<br>N=514 | Control MAF<br>N=1187 | Case MAF<br>N=233 | Control MAF<br>N=1884 | Case MAF<br>N=92 | Control MAF<br>N=470 | Case MAF<br>N=81 | Control MAF<br>N=352 |
| 9   | rs925489   | 99586421 | 0.3098            | 0.3582                | 0.2724            | 0.3353                | 0.3026            | 0.3546                | 0.2473           | 0.3347               | 0.2346           | 0.3366               |
| 9   | rs7850258  | 99588834 | 0.3098            | 0.3582                | 0.2724            | 0.3353                | 0.3004            | 0.3547                | 0.2446           | 0.3326               | 0.2346           | 0.3366               |
| 9   | rs965513   | 99595930 | 0.3086            | 0.3586                | 0.2743            | 0.3357                | 0.3026            | 0.3551                | 0.2473           | 0.333                | 0.2346           | 0.3381               |
| 9   | rs10759944 | 99596793 | 0.3111            | 0.3582                | 0.2724            | 0.3336                | 0.3026            | 0.3536                | 0.2473           | 0.3337               | 0.2346           | 0.3352               |

**Table S2: Characteristics of hypothyroidism cases and controls.**

Plus-minus values are mean±SD.

|                             | Unmatched Analysis |                    | Matched Analysis |                    | Replication Set |                    |
|-----------------------------|--------------------|--------------------|------------------|--------------------|-----------------|--------------------|
|                             | Cases<br>N=1317    | Controls<br>N=5053 | Cases<br>N=1314  | Controls<br>N=3150 | Cases<br>N=263  | Controls<br>N=1616 |
| Median birth decade         | 1930               | 1930               | 1930             | 1930               | 1930            | 1940               |
| Age (yr) <sup>a</sup>       | 68.7±14.0          | 60.7±12.5          | 68.3±14.0        | 63.1±12.1          | 58.9±14.2       | 53.9±13.5          |
| Female (%)                  | 73.0               | 48.3               | 73.0             | 67.8               | 78.7            | 43.9               |
| Follow-up (yr) <sup>b</sup> | 19.3±9.4           | 15.5±9.5           | 19.0±9.5         | 17.2±9.8           | 11.9±4.9        | 10.1±5.6           |

<sup>a</sup>Age is calculated as the first age matching case or control definition (e.g., a billing code, laboratory value, or medication).

<sup>b</sup>Follow-up is calculated as the number of years the patients was observed by billing codes.

**Table S3: SNPs associated with hypothyroidism at  $p < 10^{-6}$  in the unmatched and matched analyses.**  
Logistic regression adjusted for birth decade, sex, and site of ascertainment.

| SNP        | Chr | Position  | Minor allele | Nearest Gene                      | Minor Allele Frequency |         | Unmatched Analysis*  |                       | Matched Analysis     |                       |
|------------|-----|-----------|--------------|-----------------------------------|------------------------|---------|----------------------|-----------------------|----------------------|-----------------------|
|            |     |           |              |                                   | Case                   | Control | OR (95% CI)          | p-value               | OR (95% CI)          | p-value               |
| rs7850258  | 9   | 99588834  | A            | <i>FOXE1</i>                      | 0.285                  | 0.348   | 0.74<br>(0.67, 0.82) | $3.96 \times 10^{-9}$ | 0.75<br>(0.67, 0.83) | $1.42 \times 10^{-8}$ |
| rs965513   | 9   | 99595930  | A            | <i>FOXE1</i>                      | 0.286                  | 0.348   | 0.74<br>(0.67, 0.82) | $4.19 \times 10^{-9}$ | 0.75<br>(0.67, 0.83) | $1.52 \times 10^{-8}$ |
| rs925489   | 9   | 99586421  | C            | <i>FOXE1</i>                      | 0.286                  | 0.348   | 0.74<br>(0.67, 0.82) | $4.68 \times 10^{-9}$ | 0.75<br>(0.67, 0.83) | $1.58 \times 10^{-8}$ |
| rs10759944 | 9   | 99596793  | A            | <i>FOXE1</i>                      | 0.286                  | 0.347   | 0.75<br>(0.68, 0.83) | $8.19 \times 10^{-9}$ | 0.75<br>(0.68, 0.83) | $2.53 \times 10^{-8}$ |
| rs4979402  | 9   | 116262496 | G            | <i>DFNB31</i>                     | 0.288                  | 0.247   | 1.29<br>(1.16, 1.42) | $1.23 \times 10^{-6}$ | 1.24<br>(1.12, 1.38) | $6.76 \times 10^{-5}$ |
| rs4979397  | 9   | 116259709 | T            | <i>DFNB31</i>                     | 0.286                  | 0.246   | 1.28<br>(1.16, 1.42) | $1.91 \times 10^{-6}$ | 1.23<br>(1.11, 1.37) | $9.56 \times 10^{-5}$ |
| rs1877432  | 9   | 99583701  | A            | 9q22.3                            | 0.437                  | 0.382   | 1.25<br>(1.14, 1.37) | $1.99 \times 10^{-6}$ | 1.25<br>(1.14, 1.38) | $3.90 \times 10^{-6}$ |
| rs1408528  | 9   | 116260594 | C            | <i>DFNB31</i>                     | 0.286                  | 0.246   | 1.28<br>(1.16, 1.42) | $2.07 \times 10^{-6}$ | 1.23<br>(1.11, 1.37) | $1.01 \times 10^{-4}$ |
| rs17827152 | 4   | 55173443  | A            | 4q12;<br>closest to<br><i>KIT</i> | 0.263                  | 0.219   | 1.28<br>(1.15, 1.42) | $3.20 \times 10^{-6}$ | 1.29<br>(1.16, 1.44) | $5.20 \times 10^{-6}$ |
| rs1535971  | 9   | 116269221 | T            | <i>DFNB31</i>                     | 0.299                  | 0.260   | 1.27<br>(1.15, 1.40) | $3.65 \times 10^{-6}$ | 1.22<br>(1.10, 1.35) | $1.73 \times 10^{-4}$ |
| rs17043990 | 3   | 72963160  | C            | <i>SHQ1</i>                       | 0.0091                 | 0.0024  | 3.71<br>(2.08, 6.60) | $8.34 \times 10^{-6}$ | 4.37<br>(2.16, 8.83) | $1.58 \times 10^{-6}$ |

*DFNB31* SNPs are in the gene

*FOXE1* SNPs are from 58kb to 71kb to the gene

*DIRAS2* SNP is in the gene

**Table S4: Association of variants near *FOXE1* by eMERGE site in the matched analysis.**

| SNP        | Coded/<br>Non-Coded | All Sites              |          | GHC                    |         | Marshfield             |         | Mayo                   |         | Northwestern           |         | Vanderbilt             |         |
|------------|---------------------|------------------------|----------|------------------------|---------|------------------------|---------|------------------------|---------|------------------------|---------|------------------------|---------|
|            |                     | Odds Ratio<br>(95% CI) | P-value  | Odds Ratio<br>(95% CI) | P-value | Odds Ratio<br>(95% CI) | P-value | Odds Ratio<br>(95% CI) | P-value | Odds Ratio<br>(95% CI) | P-value | Odds Ratio<br>(95% CI) | P-value |
| rs7850258  | A/G                 | 0.74<br>(0.67, 0.83)   | 1.42E-08 | 0.79<br>(0.66, 0.95)   | 0.011   | 0.74<br>(0.62, 0.89)   | 0.0011  | 0.77<br>(0.61, 0.96)   | 0.020   | 0.54<br>(0.35, 0.84)   | 0.0039  | 0.69<br>(0.49, 0.97)   | 0.030   |
| rs965513   | A/G                 | 0.75<br>(0.67, 0.83)   | 1.52E-08 | 0.78<br>(0.65, 0.94)   | 0.0088  | 0.75<br>(0.62, 0.90)   | 0.0015  | 0.77<br>(0.61, 0.97)   | 0.023   | 0.54<br>(0.35, 0.83)   | 0.0031  | 0.69<br>(0.49, 0.97)   | 0.030   |
| rs925489   | C/T                 | 0.75<br>(0.67, 0.83)   | 1.58E-08 | 0.79<br>(0.66, 0.95)   | 0.011   | 0.74<br>(0.62, 0.89)   | 0.0011  | 0.77<br>(0.62, 0.97)   | 0.024   | 0.54<br>(0.35, 0.83)   | 0.0031  | 0.69<br>(0.49, 0.97)   | 0.030   |
| rs10759944 | A/G                 | 0.75<br>(0.68, 0.83)   | 2.53E-08 | 0.80<br>(0.66, 0.95)   | 0.013   | 0.75<br>(0.62, 0.9)    | 0.0014  | 0.78<br>(0.62, 0.97)   | 0.027   | 0.54<br>(0.35, 0.83)   | 0.0031  | 0.69<br>(0.49, 0.97)   | 0.028   |
| rs1877432  | A/G                 | 1.25<br>(1.14, 1.38)   | 3.90E-06 | 1.14<br>(0.96, 1.35)   | 0.123   | 1.35<br>(1.15, 1.60)   | 0.00033 | 1.13<br>(0.91, 1.40)   | 0.27    | 1.73<br>(1.18, 2.53)   | 0.0038  | 1.33<br>(0.94, 1.86)   | 0.104   |

**Table S5: Strongest associations for HLA region in unmatched analysis for European Americans.** Analysis is adjusted by birth decade, sex, site, and the first principle component. All associations with  $p < 1 \times 10^{-2}$  are shown below.

| <b>CHR</b> | <b>SNP</b> | <b>Chromosomal<br/>Position</b> | <b>Minor<br/>Alleles</b> | <b>Odds<br/>Ratio</b> | <b>P</b>              |
|------------|------------|---------------------------------|--------------------------|-----------------------|-----------------------|
| 6          | rs2735076  | 30051469                        | T                        | 1.20                  | $3.61 \times 10^{-4}$ |
| 6          | rs5025708  | 30063178                        | G                        | 1.26                  | $3.95 \times 10^{-4}$ |
| 6          | rs3094170  | 29937244                        | A                        | 1.23                  | $5.38 \times 10^{-4}$ |
| 6          | rs9394167  | 33862374                        | A                        | 0.86                  | $9.70 \times 10^{-4}$ |
| 6          | rs3025643  | 29677934                        | T                        | 1.16                  | $9.76 \times 10^{-4}$ |
| 6          | rs3806109  | 33878348                        | G                        | 1.16                  | $1.17 \times 10^{-3}$ |
| 6          | rs9380167  | 30382440                        | G                        | 0.85                  | $1.34 \times 10^{-3}$ |
| 6          | rs3130253  | 29741991                        | A                        | 1.28                  | $1.35 \times 10^{-3}$ |
| 6          | rs9277912  | 33232636                        | T                        | 1.20                  | $1.46 \times 10^{-3}$ |
| 6          | rs4711348  | 33844273                        | G                        | 0.87                  | $1.51 \times 10^{-3}$ |
| 6          | rs2296748  | 33853049                        | T                        | 1.15                  | $1.67 \times 10^{-3}$ |
| 6          | rs9266409  | 31444547                        | C                        | 0.84                  | $1.75 \times 10^{-3}$ |
| 6          | rs6933050  | 31451611                        | C                        | 0.84                  | $1.76 \times 10^{-3}$ |
| 6          | rs1063355  | 32735692                        | A                        | 0.87                  | $1.77 \times 10^{-3}$ |
| 6          | rs3130252  | 29739723                        | C                        | 1.20                  | $1.80 \times 10^{-3}$ |
| 6          | rs1535950  | 33893805                        | G                        | 1.15                  | $1.86 \times 10^{-3}$ |
| 6          | rs7770216  | 31448590                        | T                        | 0.84                  | $2.11 \times 10^{-3}$ |
| 6          | rs2281820  | 33876875                        | T                        | 0.87                  | $2.23 \times 10^{-3}$ |
| 6          | rs3135050  | 29736416                        | T                        | 1.19                  | $2.37 \times 10^{-3}$ |
| 6          | rs29230    | 29684372                        | C                        | 0.83                  | $2.38 \times 10^{-3}$ |
| 6          | rs29225    | 29689020                        | C                        | 0.79                  | $2.45 \times 10^{-3}$ |
| 6          | rs9261387  | 30169340                        | T                        | 1.26                  | $2.49 \times 10^{-3}$ |
| 6          | rs740882   | 29683435                        | A                        | 0.79                  | $2.54 \times 10^{-3}$ |
| 6          | rs2477232  | 34001130                        | A                        | 0.80                  | $2.64 \times 10^{-3}$ |
| 6          | rs3132679  | 30183822                        | A                        | 1.20                  | $2.68 \times 10^{-3}$ |
| 6          | rs9264869  | 31379609                        | G                        | 1.22                  | $2.70 \times 10^{-3}$ |
| 6          | rs3948793  | 32867426                        | T                        | 1.15                  | $2.71 \times 10^{-3}$ |
| 6          | rs9277965  | 33364375                        | A                        | 1.19                  | $2.80 \times 10^{-3}$ |
| 6          | rs9357097  | 30393100                        | T                        | 0.86                  | $2.87 \times 10^{-3}$ |
| 6          | rs9276711  | 32865275                        | T                        | 1.15                  | $2.92 \times 10^{-3}$ |
| 6          | rs3117073  | 29652804                        | G                        | 1.16                  | $2.92 \times 10^{-3}$ |
| 6          | rs3132726  | 29931585                        | T                        | 1.16                  | $3.04 \times 10^{-3}$ |
| 6          | rs4713610  | 33215933                        | G                        | 1.19                  | $3.16 \times 10^{-3}$ |
| 6          | rs1633068  | 29832289                        | A                        | 1.18                  | $3.19 \times 10^{-3}$ |
| 6          | rs241425   | 32912887                        | T                        | 0.88                  | $3.23 \times 10^{-3}$ |
| 6          | rs1610628  | 29836188                        | G                        | 1.18                  | $3.25 \times 10^{-3}$ |
| 6          | rs9276644  | 32853021                        | C                        | 1.14                  | $3.40 \times 10^{-3}$ |
| 6          | rs12665339 | 30709211                        | G                        | 0.84                  | $3.51 \times 10^{-3}$ |
| 6          | rs6457769  | 34339548                        | C                        | 1.22                  | $3.65 \times 10^{-3}$ |
| 6          | rs942496   | 33896033                        | T                        | 0.84                  | $3.65 \times 10^{-3}$ |

|   |            |          |   |      |                       |
|---|------------|----------|---|------|-----------------------|
| 6 | rs932338   | 29814912 | T | 1.18 | $3.75 \times 10^{-3}$ |
| 6 | rs7765379  | 32788906 | G | 1.22 | $3.83 \times 10^{-3}$ |
| 6 | rs3957165  | 33892842 | G | 0.85 | $3.84 \times 10^{-3}$ |
| 6 | rs9368781  | 33976857 | A | 0.81 | $4.00 \times 10^{-3}$ |
| 6 | rs2523710  | 31558888 | T | 0.84 | $4.23 \times 10^{-3}$ |
| 6 | rs942510   | 33985605 | T | 0.81 | $4.45 \times 10^{-3}$ |
| 6 | rs2235498  | 33238408 | T | 1.16 | $4.83 \times 10^{-3}$ |
| 6 | rs2844673  | 31069905 | A | 0.83 | $5.12 \times 10^{-3}$ |
| 6 | rs9258883  | 29945167 | C | 1.15 | $5.18 \times 10^{-3}$ |
| 6 | rs2517409  | 31072372 | G | 0.83 | $5.18 \times 10^{-3}$ |
| 6 | rs2252926  | 31074283 | G | 0.83 | $5.18 \times 10^{-3}$ |
| 6 | rs9366829  | 33881177 | G | 1.13 | $5.31 \times 10^{-3}$ |
| 6 | rs9264868  | 31379580 | G | 1.20 | $5.72 \times 10^{-3}$ |
| 6 | rs1002985  | 32960426 | T | 0.74 | $5.75 \times 10^{-3}$ |
| 6 | rs6913294  | 31379103 | A | 0.80 | $5.85 \times 10^{-3}$ |
| 6 | rs9380376  | 33832772 | T | 1.14 | $5.90 \times 10^{-3}$ |
| 6 | rs2523898  | 31101512 | T | 1.13 | $6.14 \times 10^{-3}$ |
| 6 | rs9391714  | 31353059 | A | 0.70 | $6.17 \times 10^{-3}$ |
| 6 | rs12211633 | 34158895 | C | 1.14 | $6.30 \times 10^{-3}$ |
| 6 | rs9380374  | 33785534 | A | 1.14 | $6.34 \times 10^{-3}$ |
| 6 | rs4713447  | 31270942 | G | 0.89 | $6.47 \times 10^{-3}$ |
| 6 | rs3868075  | 31275794 | C | 0.89 | $6.47 \times 10^{-3}$ |
| 6 | rs12206652 | 34173960 | G | 0.87 | $6.49 \times 10^{-3}$ |
| 6 | rs1264420  | 30683582 | T | 1.14 | $6.62 \times 10^{-3}$ |
| 6 | rs9405048  | 30778271 | T | 0.85 | $6.62 \times 10^{-3}$ |
| 6 | rs9266773  | 31460327 | C | 1.22 | $6.70 \times 10^{-3}$ |
| 6 | rs9357152  | 32772938 | G | 1.15 | $6.77 \times 10^{-3}$ |
| 6 | rs1906953  | 34144424 | T | 1.19 | $7.10 \times 10^{-3}$ |
| 6 | rs2524044  | 31364732 | C | 1.17 | $7.62 \times 10^{-3}$ |
| 6 | rs9277920  | 33233703 | A | 1.13 | $7.75 \times 10^{-3}$ |
| 6 | rs3778624  | 30410579 | G | 0.87 | $7.80 \times 10^{-3}$ |
| 6 | rs753725   | 30998850 | A | 1.12 | $7.81 \times 10^{-3}$ |
| 6 | rs2532919  | 31041954 | G | 0.84 | $7.84 \times 10^{-3}$ |
| 6 | rs9405015  | 31263782 | T | 0.59 | $7.93 \times 10^{-3}$ |
| 6 | rs2523864  | 31126525 | A | 1.13 | $7.96 \times 10^{-3}$ |
| 6 | rs2524077  | 31351582 | A | 1.17 | $8.53 \times 10^{-3}$ |
| 6 | rs2532934  | 31002738 | C | 1.12 | $8.94 \times 10^{-3}$ |
| 6 | rs2844651  | 31008643 | A | 1.12 | $9.02 \times 10^{-3}$ |
| 6 | rs2442749  | 31460019 | G | 1.13 | $9.27 \times 10^{-3}$ |
| 6 | rs2844498  | 31584833 | A | 1.12 | $9.49 \times 10^{-3}$ |
| 6 | rs9366755  | 30394708 | T | 0.85 | $9.60 \times 10^{-3}$ |
| 6 | rs1061535  | 30045903 | A | 1.15 | $9.98 \times 10^{-3}$ |

**Table S6: *FOXE1* SNPs associated with hypothyroidism in the Replication Analysis.**

The Hardy-Weinberg equilibrium for each SNP in cases and controls was  $p > 0.44$ .

MAF=Minor allele frequency.

| SNP        | Position | Nearest Gene | Coded/ NonCoded | Odds Ratio (95% CI) | MAF control | MAF case | p-value              |
|------------|----------|--------------|-----------------|---------------------|-------------|----------|----------------------|
| rs7850258  | 99588834 | <i>FOXE1</i> | A/G             | 0.60<br>(0.48-0.74) | 0.35        | 0.25     | $5.7 \times 10^{-6}$ |
| rs965513   | 99595930 | <i>FOXE1</i> | A/G             | 0.59<br>(0.47-0.74) | 0.35        | 0.25     | $4.8 \times 10^{-6}$ |
| rs925489   | 99586421 | <i>FOXE1</i> | C/T             | 0.59<br>(0.46-0.74) | 0.35        | 0.25     | $1.1 \times 10^{-5}$ |
| rs10759944 | 99596793 | <i>FOXE1</i> | A/G             | 0.60<br>(0.47-0.75) | 0.34        | 0.25     | $7.6 \times 10^{-6}$ |



**Figure S1: Algorithm for identifying primary hypothyroidism cases and controls.**

Of the PH cases, 204 (15% of the cases) had testing for anti-thyroperoxidase antibodies in their EMR, and 111 (54%) individuals had positive antibody tests as defined by EMR-specific reference ranges.

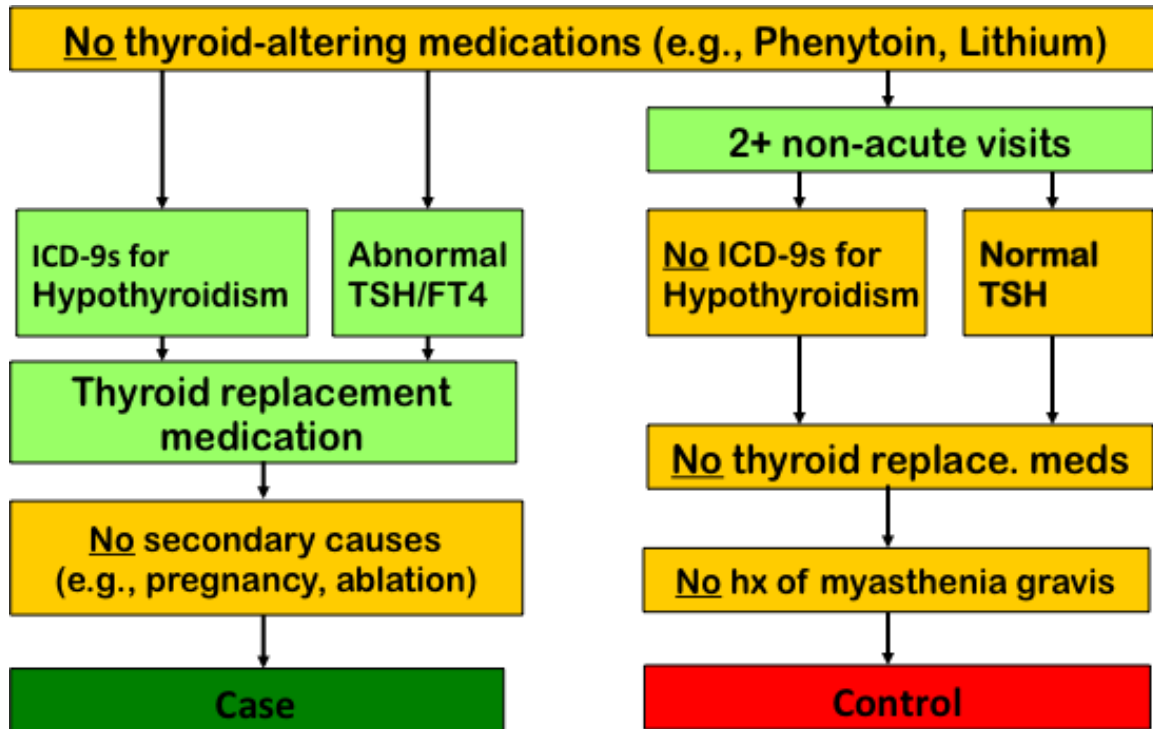

**Figure S2: Analysis of Linkage Disequilibrium from 1000genomes Pilot 1 CEU samples to *FOXE1* locus (rs7850258).**

All SNPs in *FOXE1* had  $r^2 < 0.42$  using 1000 genomes data.

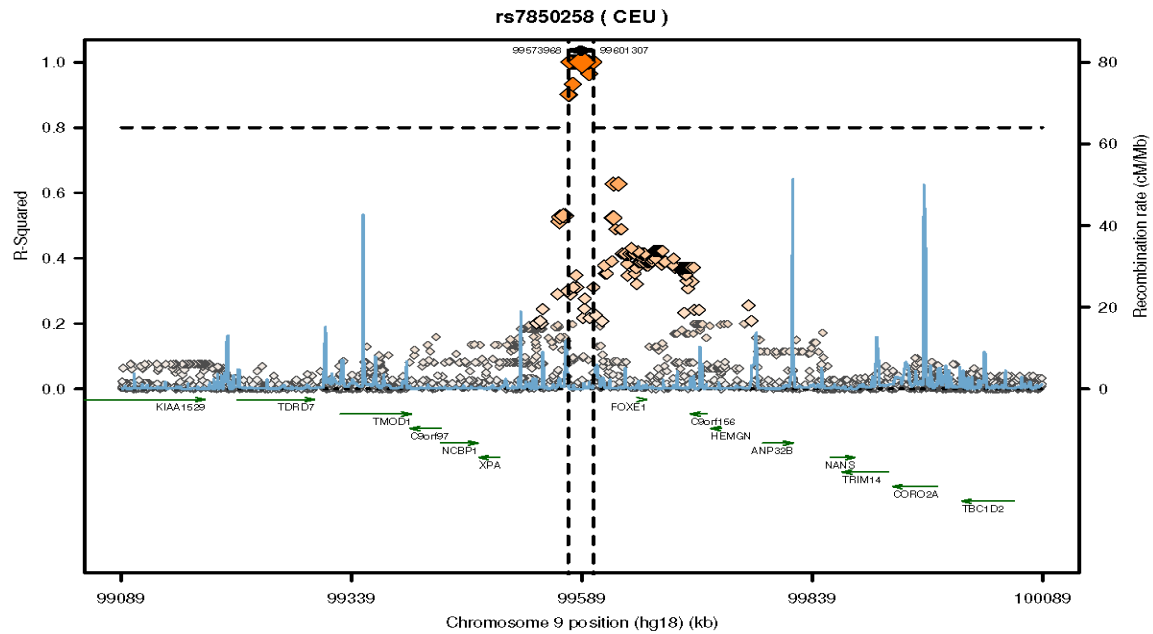

**Figure S3: Genome-wide Association Analysis from non-TSH controls.**

Single nucleotide polymorphism (SNP) tests of association (logistic regression) assuming an additive genetic model adjusted for sex and age. The red horizontal line indicates  $P=5 \times 10^{-8}$ , the threshold for genome-wide significance.

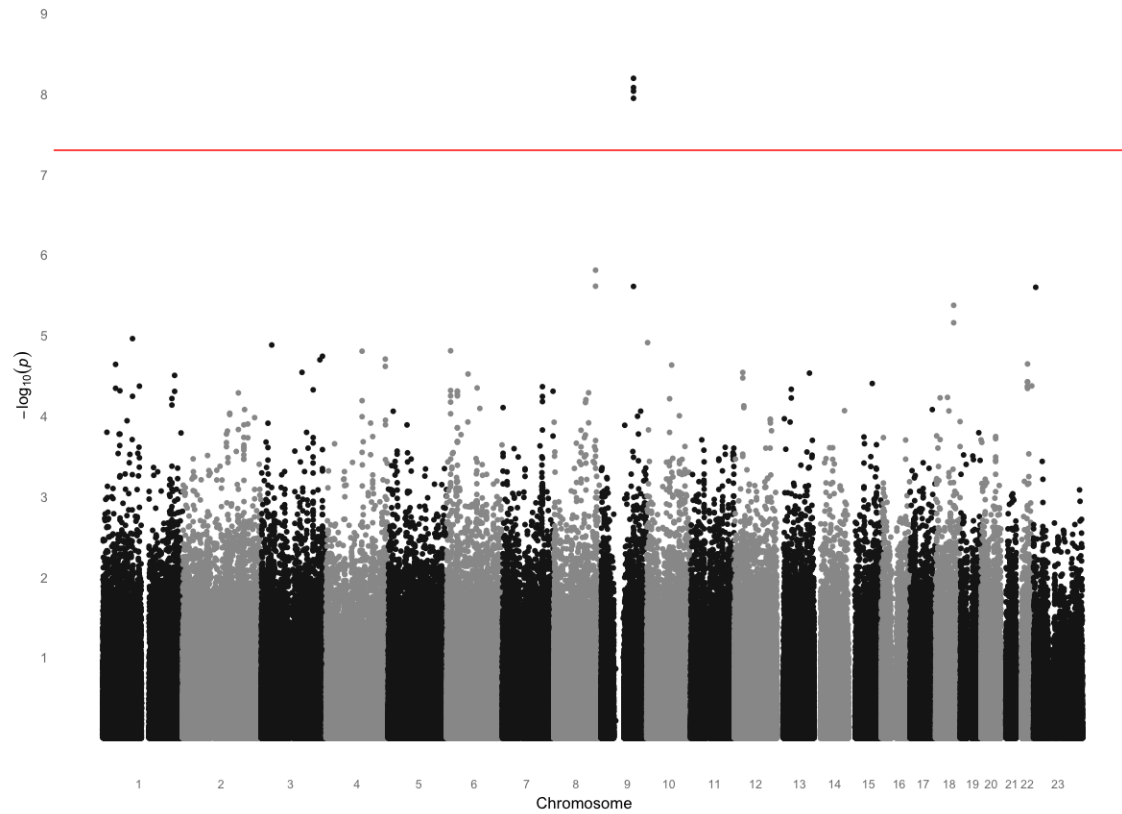

**Figure S4: Result of Genome-wide Association Analysis from Matched Analysis.**

Single nucleotide polymorphism (SNP) tests of association (logistic regression) assuming an additive genetic model adjusted for sex, birth decade, and study site. The red horizontal line indicates  $P=5 \times 10^{-8}$ , the threshold for genome-wide significance.

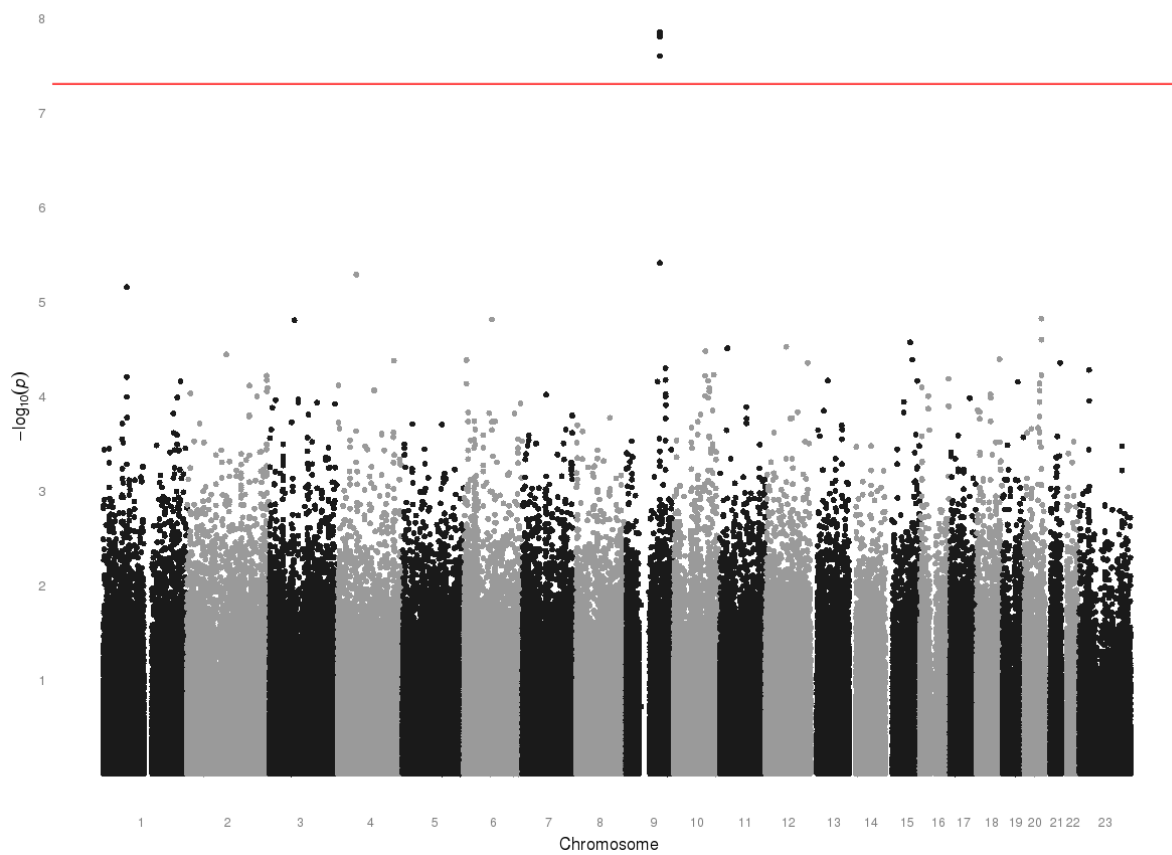

**Figure S5: Location and linkage disequilibrium ( $r^2$ ) for SNPs surrounding *FOXE1* from matched analysis.**

Recombination rates were generated using imputation from the eMERGE dataset.

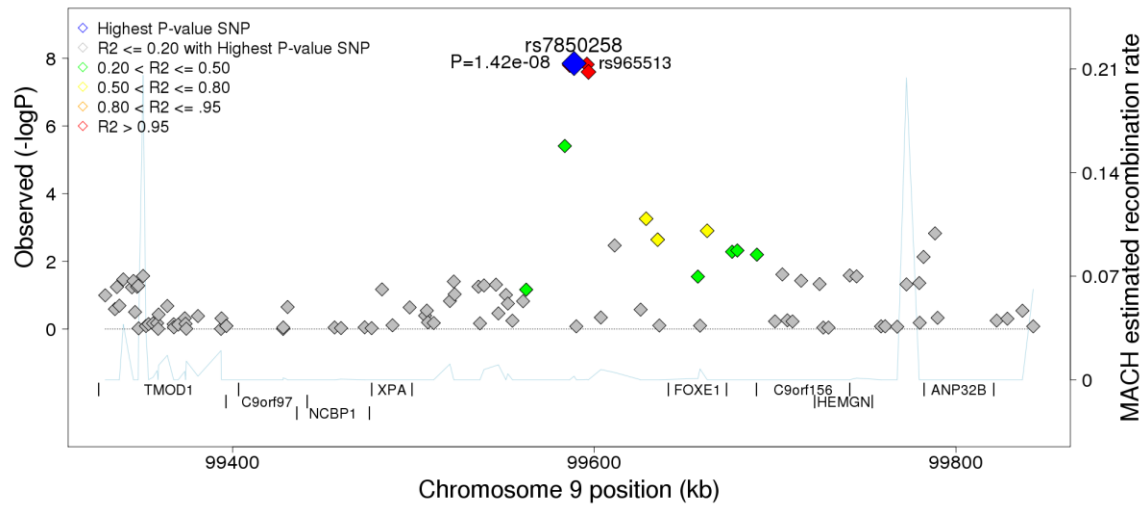

Figure S6: Q-Q plot for unmatched analysis.

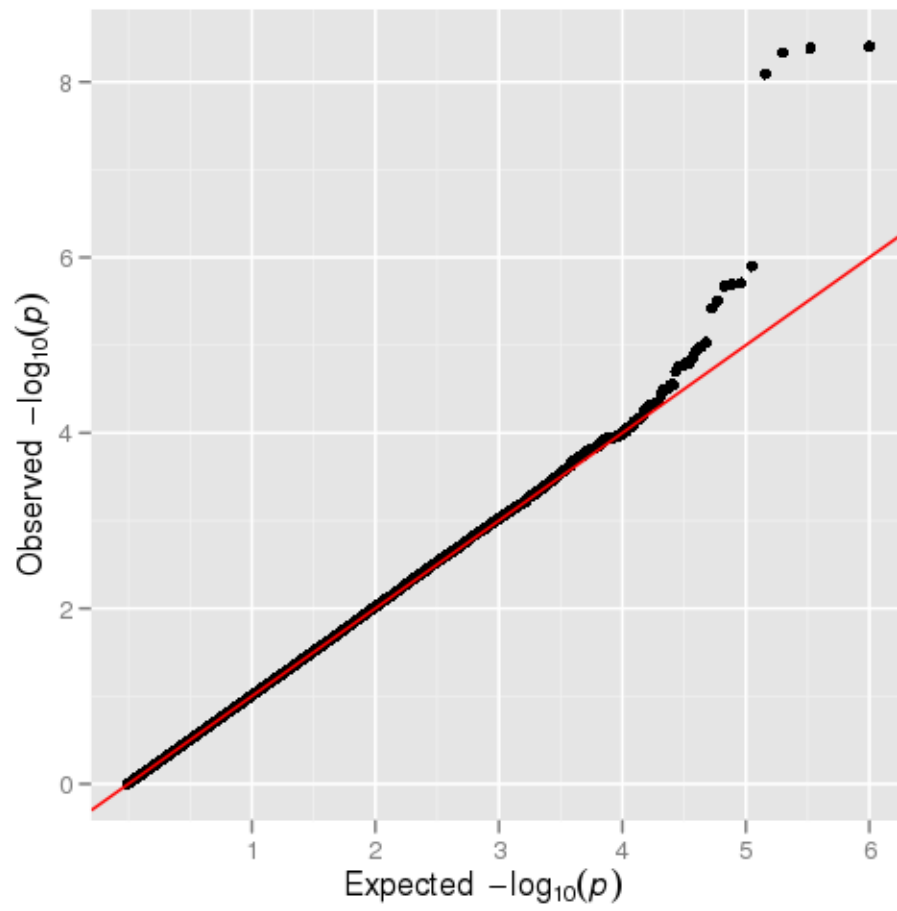

Figure S7: Q-Q plot for comparison to non-TSH controls.

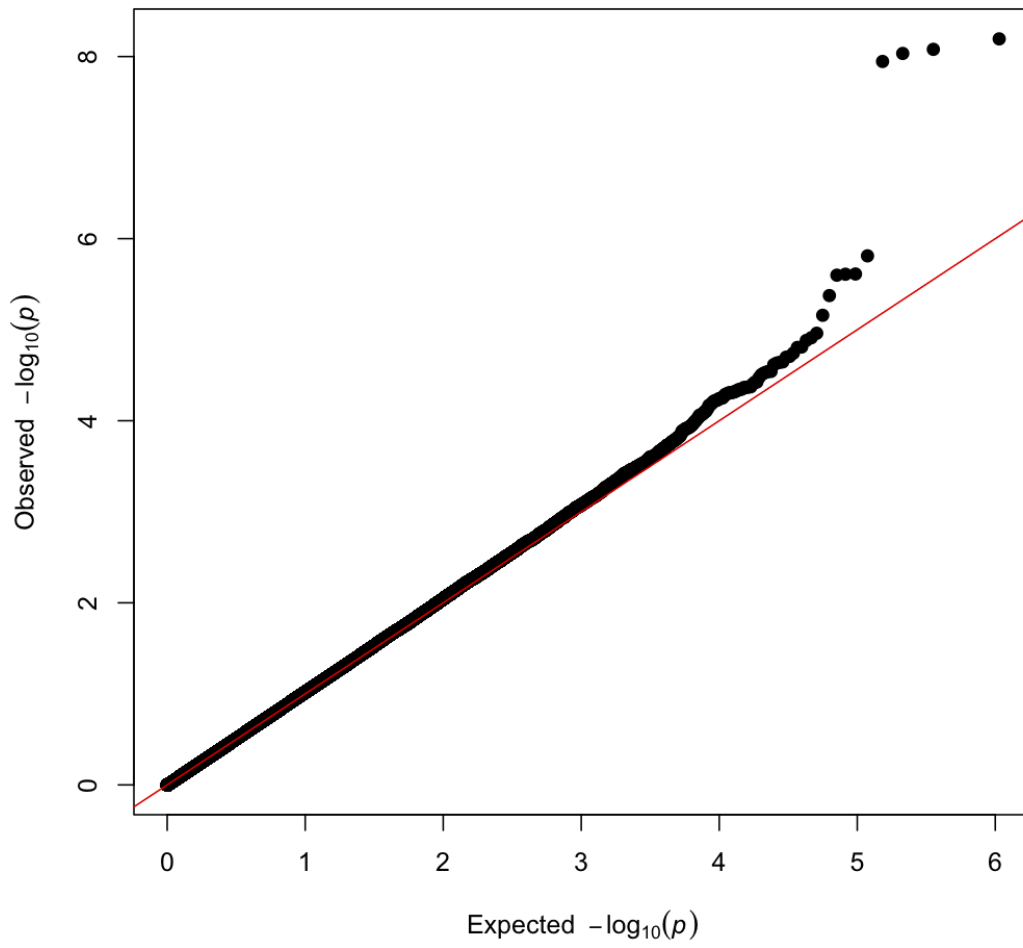

Figure S8: Q-Q plot for matched analysis.

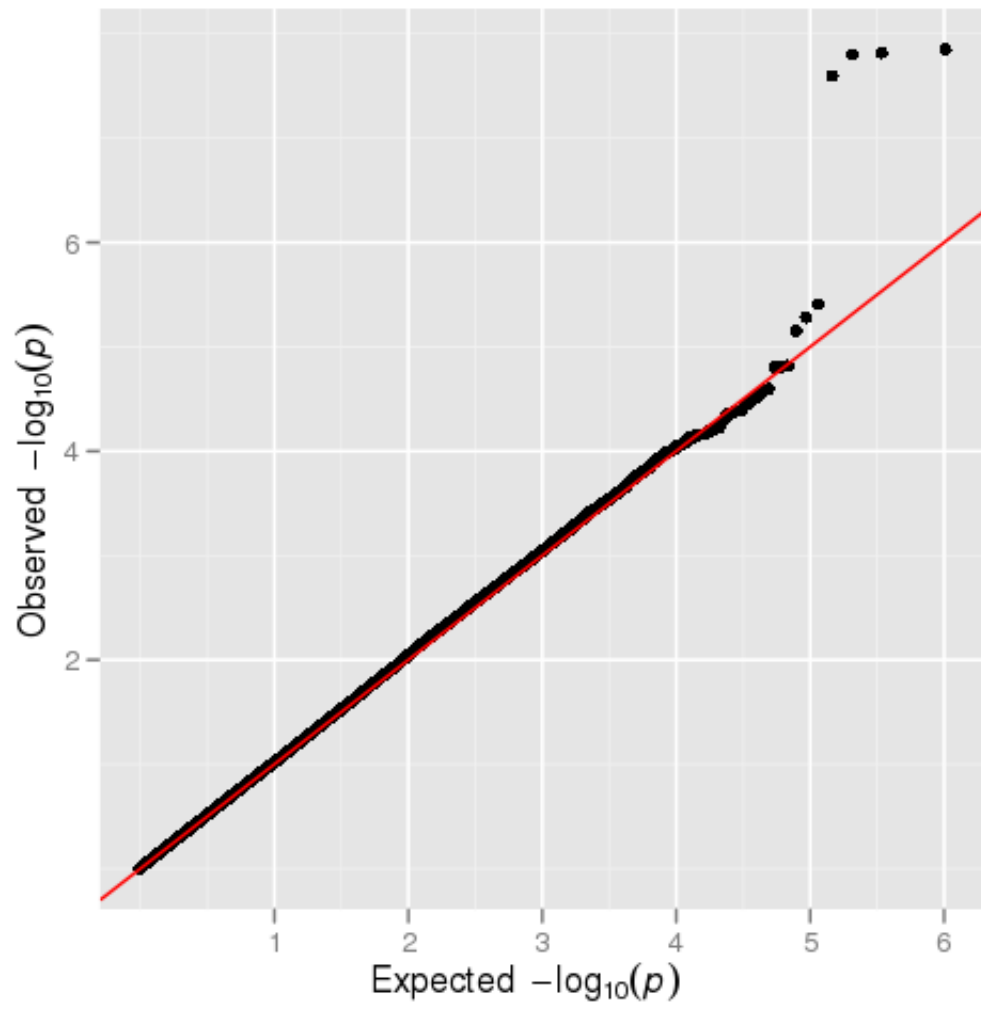

Supplement: mmc1.pdf [file mmc1.pdf]
